# Supplementary material
Source: PubMed Central journal article supplement (PMC5110488)
Supplement: 13142_2015_371_MOESM4_ESM.pdf [file 13142_2015_371_MOESM4_ESM.pdf]

**Program Perceptions and Characteristics (n= 244 MU)**

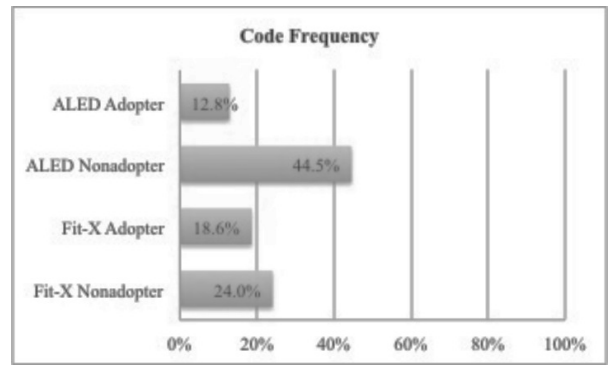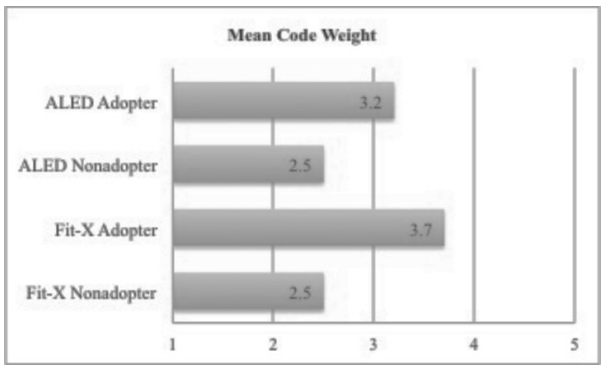

**Program Materials (n= 222 MU)**

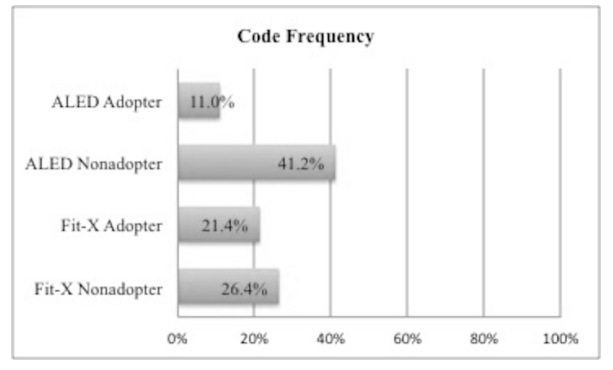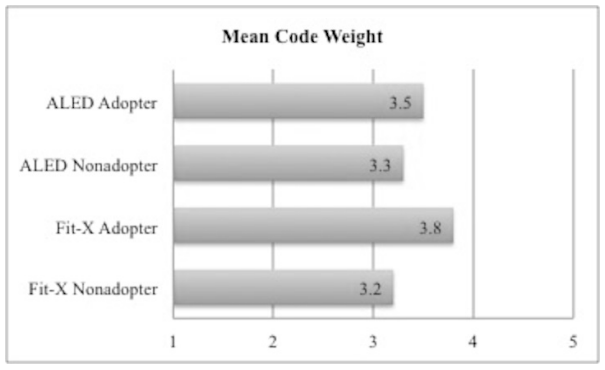

**Program Processes (n= 219 MU)**

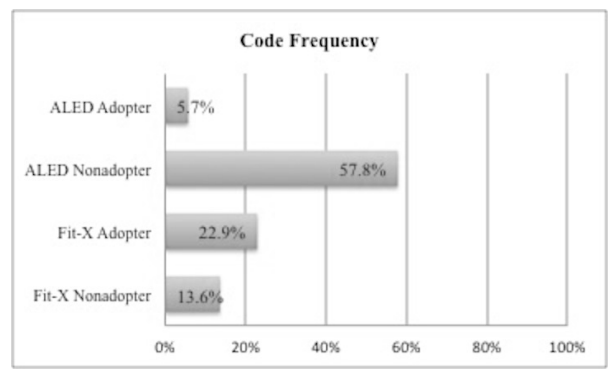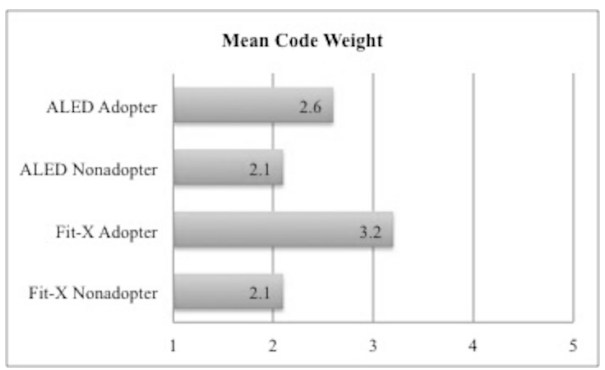

### Implementation and Adaptations (n= 137 MU)

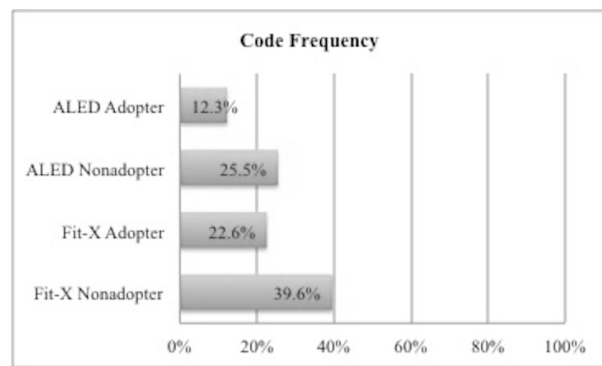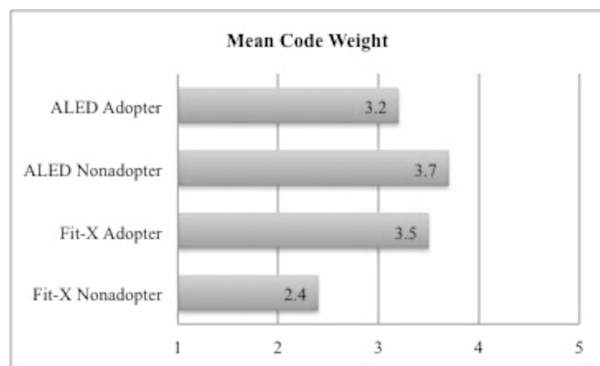

### Fit within System (n= 103 MU)

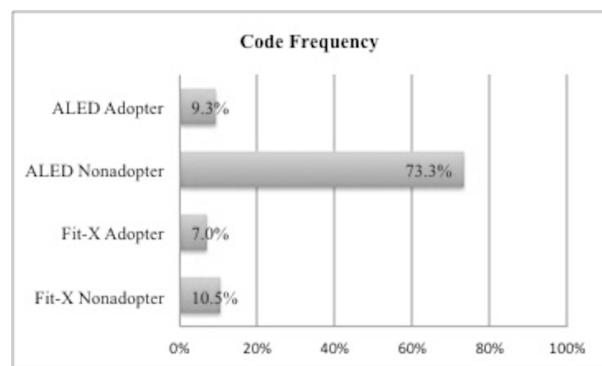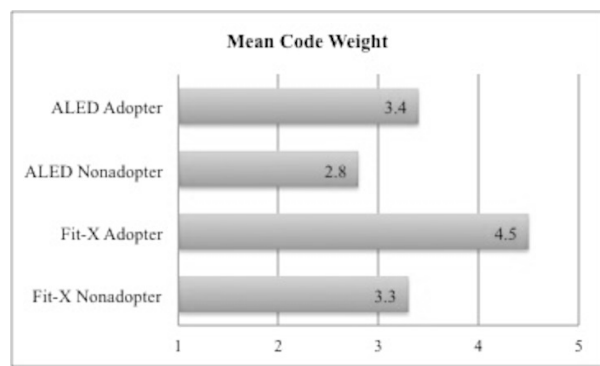

### Collaborators and Existing Partnerships (n= 102 MU)

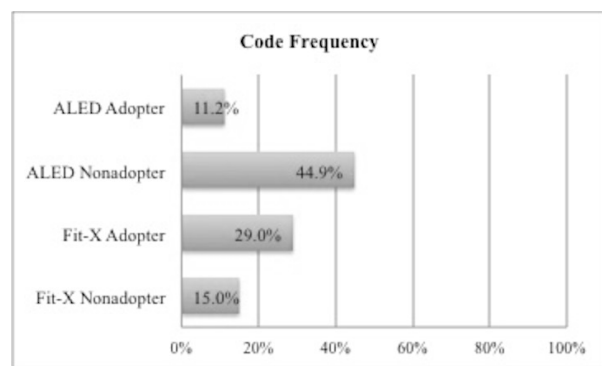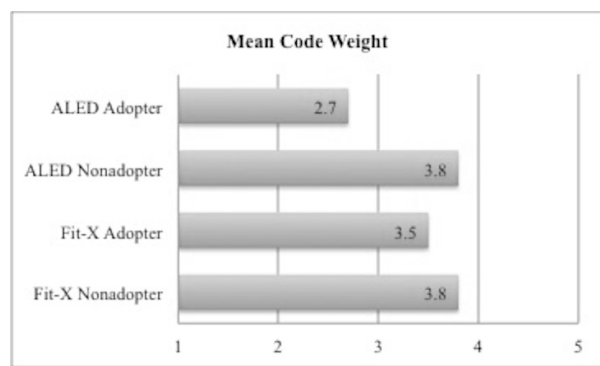

Note: MU= MU; For code weight, 1= negative, 5= positive
